# Supplementary figures and images for: Electrical properties of inorganic nanowire–polymer composites
Source: Royal Society of Chemistry journal article supplement (doi:10.1039/b511429b), 2005-01-01

Supplementary Figure: (a) SEM image and (b) TEM image of PANI-ZnONW (1:4)  
prepared by the ex-situ method.

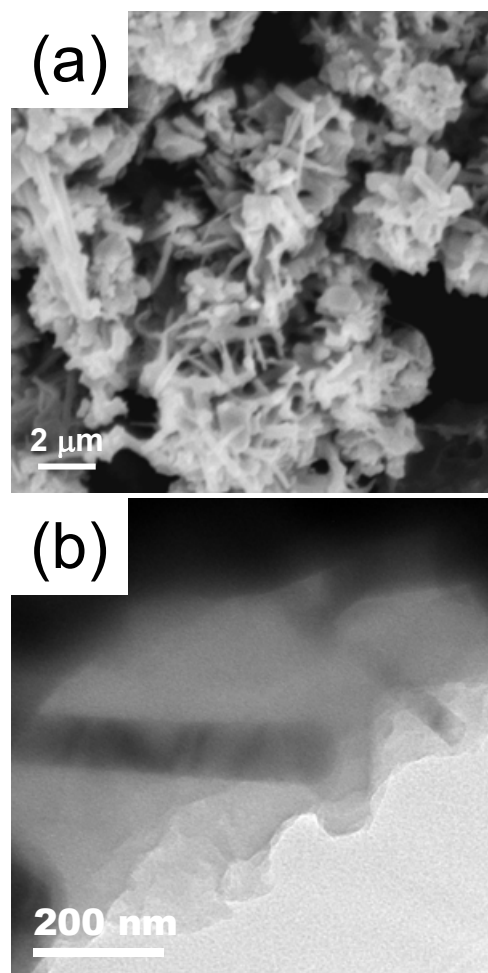

Supplement: b511429b.pdf [file b511429b.pdf]
